**Title: Hot droughts compromise interannual survival across all group sizes in a cooperatively breeding bird**

**Running title: Hot droughts compromise interannual survival**

Amanda R. Bourne<sup>\*1</sup>, Susan J. Cunningham<sup>1</sup>, Claire N. Spottiswoode<sup>1,2</sup>, Amanda R. Ridley<sup>1,3</sup>

<sup>1</sup> FitzPatrick Institute of African Ornithology, DST-NRF Centre of Excellence, University of Cape Town, Private Bag X3, Rondebosch 7701, South Africa

<sup>2</sup> Department of Zoology, University of Cambridge, Downing Street, Cambridge CB2 3EJ, UK

<sup>3</sup> Centre for Evolutionary Biology, School of Biological Sciences, University of Western Australia, Crawley 6009, Australia

Author contacts: ARB ([abourne.uct@gmail.com](mailto:abourne.uct@gmail.com)), SJC ([susie.j.c@gmail.com](mailto:susie.j.c@gmail.com)), CNS ([cns26@cam.ac.uk](mailto:cns26@cam.ac.uk)), ARR ([amanda.ridley@uwa.edu.au](mailto:amanda.ridley@uwa.edu.au))

\*Corresponding author: Amanda Ruth Bourne; 0027 (83) 440 2081; [abourne.uct@gmail.com](mailto:abourne.uct@gmail.com)

FitzPatrick Institute of African Ornithology, Room 2.18, John Day Zoology Building, University Avenue, University of Cape Town, 7701, South Africa

**Keywords:** Sociality, unpredictable environments, cooperative breeding, climate change, southern pied babbler, hot drought, group size

**Statement of authorship**

ARR, SJC, ARB, and CNS conceived the study and secured funding. ARR started habituation of the study animals and collection of life history data in 2003 and has maintained it ever since; this was central to making the study possible. ARB undertook all fieldwork from 2016 onwards. ARB and ARR analysed the data. ARB drafted the manuscript. All authors contributed substantially to revisions, and gave final approval for publication.

**Data accessibility statement**

24 The data underlying all analyses presented here will be archived at the University of Cape  
25 Town's open-access institutional data repository, ZivaHub (a figshare platform), where it will  
26 be publicly available.

## **Abstract**

Increasingly harsh and unpredictable climate regimes are affecting animal populations around the world as climate change advances. One relatively unexplored aspect of species vulnerability to climate change is whether and to what extent responses to environmental stressors might be mitigated by variation in group size in social species. We used a 15-year dataset for a cooperatively-breeding bird, the southern pied babbler *Turdoides bicolor*, to determine the impact of temperature, rainfall, and group size on body mass change and interannual survival in both juveniles and adults. Hot and dry conditions were associated with reduced juvenile growth, mass loss in adults, and compromised survival between years in both juveniles (-86%) and adults (-60%). Individuals across all group sizes experienced similar effects of climatic conditions. Larger group sizes may not buffer individual group members against the impacts of hot and dry conditions, which are expected to increase in frequency and severity in future.

## Introduction

Anthropogenic climate change is affecting population dynamics across taxa (du Plessis *et al.* 2012; Allen *et al.* 2015; Rey *et al.* 2017; Spooner *et al.* 2018). Understanding life history responses to current environmental conditions is increasingly important for predicting vulnerability to future climate change (Camacho *et al.* 2018; Conradie *et al.* 2019). Species living in arid and semi-arid environments are useful models for studying such responses, because these environments are characterised by extremes in temperature and rainfall (McKechnie *et al.* 2012), and are experiencing rapid increases in temperature and interannual rainfall variability as a result of anthropogenic climate change (Feng & Fu 2013; Mayaud *et al.* 2017). Despite evidence that arid-zone species are well adapted to harsh and unpredictable environments (McKechnie *et al.* 2016; O'Connor *et al.* 2017), increasing temperatures and decreasing rainfall measurably affect behaviour, body condition, growth, and survival in arid-zone birds (McKechnie & Wolf 2010; Cunningham *et al.* 2013; Sunday *et al.* 2014; Iknayan & Beissinger 2018). While droughts are a natural feature of arid and semi-arid ecosystems (MacKellar *et al.* 2014; Tokura *et al.* 2018), an increase in the frequency of ‘hot droughts’ – when above-average temperatures and below-average rainfall co-occur (Overpeck 2013) – is likely (New *et al.* 2006; Kruger & Sekele 2013), with the potential to compromise population persistence in many wildlife species (Walther *et al.* 2002; Sinervo *et al.* 2010; Cruz-McDonnell & Wolf 2016; Paniw *et al.* 2019).

Life-history traits with the potential to mitigate the impacts of high temperatures and drought are of significant interest. Global comparative studies show that the distribution of cooperatively-breeding (Rubenstein & Lovette 2007; Jetz & Rubenstein 2011; Lukas & Clutton-Brock 2017; Shen *et al.* 2017) and group-living (Griesser *et al.* 2017) birds and mammals is

associated with harsh and highly variable environments, suggesting that the presence of helpers buffers against environmental uncertainty (Jetz & Rubenstein 2011; Russell 2016; Cornwallis *et al.* 2017), at least up to an optimal number (Markham *et al.* 2015; Ridley 2016). It has been hypothesised that cooperative breeding either evolved in such environments (Rubenstein & Lovette 2007; Lukas & Clutton-Brock 2017), enabled species to colonise such environments (Cornwallis *et al.* 2017), or prevented extinction under increasingly harsh conditions (Russell 2016; Griesser *et al.* 2017). One prominent explanation for the occurrence of cooperative breeding in birds is that it represents a ‘bet-hedging’ strategy (Rubenstein 2011): breeding individuals share the costs of reproduction with helpers, enabling them to breed successfully even when conditions are poor (Rubenstein & Lovette 2007). Cooperation may therefore moderate impacts of climate change via task-partitioning (Clutton-Brock *et al.* 2004; Ridley & Raihani 2008), improved access to resources (Golabek *et al.* 2012; Ebensperger *et al.* 2016), or load-lightening (reductions in individual workload in response to the presence of helpers; Crick 1992; Hatchwell 1999; Meade *et al.* 2010; Mumme *et al.* 2015; Langmore *et al.* 2016).

A small number of recent studies empirically test the reproductive benefits of cooperation across varying environmental conditions (Langmore *et al.* 2016; Guindre-Parker & Rubenstein 2018; van de Ven *et al.* 2020), and one further considers adult survival (Guindre-Parker & Rubenstein 2020). These empirical tests primarily consider reproduction and survival in response to variation in rainfall. Temperature is rarely included despite the fact that thermoregulatory benefits of group living have been demonstrated (Paquet *et al.* 2016). Behavioural thermoregulation (investing time and energy in self-maintenance, including seeking shade or increasing rest) provides a potential mechanism through which load-lightening may buffer group members against the costs of climate variation. Individuals in larger groups may be able to

allocate more time to self-maintenance and therefore suffer fewer consequences of trade-offs between self-maintenance and other essential activities during adverse weather. This may allow higher reproductive success under challenging environmental conditions, and also better mass maintenance and improved survival probabilities.

Long-term monitoring of a population of *Turdoides bicolor* (southern pied babblers, hereafter ‘pied babblers’) provides an opportunity to empirically test the impact of environmental conditions on body mass change ( $\Delta M_b$ ) and survival between groups of different sizes in a cooperatively breeding species (Ridley 2016). Larger mass is likely to be beneficial in pied babblers because heavier individuals disperse more successfully into breeding positions (Ridley *et al.* 2008). Mass loss occurs when pied babblers provision young (Wiley & Ridley 2016), defend contested territories (Humphries 2013), are evicted from their groups (Ridley *et al.* 2008), or experience high temperatures (du Plessis *et al.* 2012). High temperature extremes have increased in frequency and severity at the study site over the last two decades (van de Ven 2017) and rainfall is extremely variable from year to year (MacKellar *et al.* 2014). In pied babblers, high temperatures and/or drought increase the risk of local extinction (Wiley 2017), reduce offspring provisioning rates (resulting in smaller nestlings; Wiley & Ridley 2016), limit foraging efficiency (du Plessis *et al.* 2012), lower daily energy expenditure (Bourne *et al.* 2019), and decrease investment in territorial defence (Golabek *et al.* 2012).

Here, we examine how within-season  $\Delta M_b$  and interannual survival in pied babblers varies with temperature, rainfall, and group size. We expected negative effects of high temperatures, and positive effects of high rainfall and larger group sizes, on 1)  $\Delta M_b$  in juveniles and in breeding adults, 2) survival of juvenile birds from nutritional independence at 90 days of age to recruitment into the adult population at one year of age, and 3) survival of breeding adults

from one breeding season to the next. Analyses do not include subordinate adults because subordinate adults (both sexes) often disperse (Ridley *et al.* 2008; Raihani *et al.* 2010) and dispersal is easily confounded with mortality (Layton-Matthews, Ozgul, & Griesser, 2018). We further predicted that larger group sizes would buffer against climatic effects due to load-lightening allowing individuals to invest more in self-directed behaviours during periods of harsh weather. Specifically, we predicted that individuals in larger groups would experience disproportionately fewer negative effects of high temperatures and drought on both  $\Delta M_b$  and survival.

## **Materials and methods**

### **Study site and system**

Pied babblers are medium-sized (60–90 g), cooperatively-breeding passerines endemic to the Kalahari Desert in southern Africa (Hockey *et al.* 2005). Fieldwork was undertaken at the 33 km<sup>2</sup> Kuruman River Reserve (KRR; 26°58'S, 21°49'E). Mean summer daily maximum temperature in the region averages  $34.7 \pm 9.7^\circ\text{C}$ , and mean annual precipitation averages  $186.2 \pm 87.5\text{mm}$  (1995–2015, van de Ven, McKechnie & Cunningham 2019). Rainfall has been declining and high temperature extremes increasing in both frequency and severity over the last 20 years (Kruger & Sekele 2013; van Wilgen *et al.* 2016; van de Ven 2017).

Pied babbler group sizes range between 3–15 adults (Ridley 2016). Groups consist of a single breeding pair, one or more subordinate adult helpers, and immature offspring (Nelson-Flower *et al.* 2011). All adult group members cooperate, participating in territorial defence, sentinel behaviour, and caring for young (Ridley 2016). Pied babblers are considered nutritionally independent (receiving < 1 feed per hour; referred to as 'juveniles') by 90 days of

age (Ridley & Raihani 2007), and are defined as sexually mature adults one year after hatching (Ridley 2016).

Birds in the study population are habituated to observation at distances of 1–5 m (Ridley & Raihani 2007). Group composition and life history checks are conducted weekly with habituated groups throughout each summer breeding season (September to March). Groups are territorial and can be reliably located by visits to each territory. Birds in the study population are marked with a unique combination of metal and colour rings for individual identification.

### **Data collection**

Data were collected for each breeding season between September 2005 and 2019. Pied babblers are sexually monomorphic (Ridley 2016; Bourne *et al.* 2018) and molecular sexing was used to determine sex of individuals (following Fridolfsson & Ellegren, 1999). Blood samples for sexing were collected by brachial venipuncture.

### *Body mass measurements*

Nestlings were weighed to 0.1 g on a top-pan scale 11 days post-hatching ( $Mass_{11}$ ). Body mass data were collected from 90 ( $\pm 15$ ) day-old birds ( $Mass_{90}$ ;  $n = 323$  mass measurements from 124 individuals) by enticing individuals to stand on a top-pan balance in exchange for a small food reward (Ridley 2016). Most measurements (74%) were collected within 7 days of the 90 day mark. Mean mass was calculated where multiple measurements per individual were available (52% of juveniles). The sampling period is justified because pied babblers are approximately fully-grown by 90 days of age (Raihani & Ridley 2007; Thompson *et al.* 2013; Ridley 2016). This was confirmed by data from 16 individuals from whom we collected  $\geq 5$  mass measurements between 75 and 105 days of age [1 (6%) maintained mass over the period, 7



(44%) lost mass, and 8 (50%) gained mass, with an average change in mass between earliest and latest measurement of ~1 g].

Body mass data were collected from adult breeding birds from the beginning (September or October,  $Mass_{Oct}$ ) and end (February or March,  $Mass_{Mar}$ ) of each breeding season in the same way as for juveniles. Variation in exact sampling periods for each mass measure reflect annual variation in the timing of the breeding season. We chose the difference between  $Mass_{Oct}$  and  $Mass_{Mar}$  as a biologically relevant measure because this time period encompasses a) the hottest months at the study site (December, average  $T_{max} = 35.71^{\circ}C$ ; and January, average  $T_{max} = 35.69^{\circ}C$ ), b) the wettest months at the study site (72% of annual rain falls December-February), and c) the core breeding season (68% of breeding occurs October-December). We collected multiple  $Mass_{Oct}$  and  $Mass_{Mar}$  measurements for 63% and 52% of the birds respectively, and used the average of all mass measurements per individual where available.

All body mass measurements from juveniles and adults were collected at dawn, representing pre-foraging body mass. Body mass change ( $\Delta M_b$ ) was calculated in grams as follows:  $\Delta M_b$  between 11 days and 90 days of age for juveniles ( $\Delta M_{b,Juv} = Mass_{90} - Mass_{11}$ ; and  $\Delta M_b$  from the start to the end of the breeding season for breeding adults ( $\Delta M_{b,Adults} = Mass_{Mar} - Mass_{Oct}$ ).

### *Life history data*

#### *(i) Juvenile birds*

All nests initiated in the study population during each breeding season were monitored to determine hatching dates. Each brood was checked daily from 14 days post-hatching onwards, to determine the date on which nestlings fledged. Natal group size ( $G.Size_{Brood}$ ; the number of

adults present in each individual's natal group between hatching and fledging; constant during the chick rearing period for all but five of 147 nests), average group size for the period between fledging and independence ( $G.Size_{90}$ ; variations in group size due to older juveniles reaching 1 year of age, or dispersal of subordinate adults, were observed in 58 of 147 breeding attempts), and brood size (number of nestlings in the brood 11 days post-hatch) were recorded for each brood. Presence/absence of fledglings was noted during weekly visits within each breeding season and presence/absence of juvenile pied babblers was recorded at one year ( $\pm 15$  days) post hatching. Presence/absence in the population at one year of age represents a 'disappearance rate' likely to be driven primarily by mortality. Dispersal typically occurs after individuals have reached sexual maturity and the mean age at first dispersal is 565 days (Nelson-Flower *et al.* 2018). Individuals that dispersed before one year of age ( $n = 1$ ) were excluded from the analysis.

## (ii) Adult breeding birds

Dominant individuals can be identified unambiguously through incubation behaviour (Ridley 2016) and distinctive duets (Wiley & Ridley 2018). Presence/absence of dominant individuals was recorded at the beginning of each breeding season during an annual census, at which point we could determine whether breeding adults had survived over the most recent winter putting them in the position to breed again. For breeding adults, territory and pair fidelity is high between years and voluntary dispersal is unusual (Raihani *et al.* 2010; Wiley & Ridley 2018). Overwinter disappearance is therefore likely to be driven primarily by mortality. Data for individuals who were dominant for only part of a breeding season due to death ( $n = 47$ ) or dispersal ( $n = 9$ ) were excluded from analyses of interannual survival. We calculated average group size during each breeding season ( $G.Size_{BrSeas}$ ; variations in group size were observed in 62 of 177 group-seasons).

# *Temperature and rainfall*

Daily maximum temperature (°C) and rainfall (mm) data were collected from an on-site weather station (Vantage Pro2, Davis Instruments, Hayward, USA; see van de Ven, McKechnie, & Cunningham, 2019). Missing data from 2009, 2010, and 2011 were sourced from a nearby South Africa Weather Services (SAWS) weather station (Van Zylsrus, 28 km), which recorded significantly repeatable temperature measurements (Lin's concordance correlation coefficient  $r_c$  = 0.957, 95 % CI: 0.951–0.962), and moderately repeatable rainfall measurements ( $r_c$  = 0.517, 95 % CI: 0.465–0.566) in comparison with the on-site weather station. Differences in rainfall were small (average difference =  $0.045 \pm 3.075$  mm, 95 % CI = -5.981–6.072 mm), suggesting that both weather stations adequately detected wet vs. dry periods.

For analyses relating to juveniles, daily maximum temperatures were averaged for the offspring developmental periods between hatching and fledging (mean  $T_{\max\text{Brood}}$ ) and between fledging and independence (mean  $T_{\max90}$ ). Rainfall was summed for the 60 days prior to initiation of incubation at the nest from which each individual fledged ( $\text{Rain}_{60}$ ; to allow for delays between rainfall and invertebrate emergence; Cumming & Bernard, 1997; Ridley & Child, 2009) and for the period between fledging and independence ( $\text{Rain}_{90}$ ). For analyses relating to adults, daily maximum temperatures were averaged, and rainfall was summed, over the whole breeding season (Sept – Mar, Mean  $T_{\max\text{BrSeas}}$ ;  $\text{Rain}_{\text{BrSeas}}$ ). Long term rainfall data for the region was used to determine the presence or absence of a meteorological drought within a breeding season ( $\text{Drought}_{\text{BrSeas}}$ ). These data were obtained from a SAWS weather station at Twee Rivieren (~120 km from the study site; available until 2013). Following Mayaud et al (2017), meteorological drought was defined as  $\leq 75\%$  of average precipitation between September and March ( $\leq 137.75$

219 mm), using long term data for the 30-year period 1984–2013 to determine average precipitation  
220 in the region.

## Box 1: Glossary of terms

|                       |                                                                                                                        |
|-----------------------|------------------------------------------------------------------------------------------------------------------------|
| Brood size            | Number of nestlings per brood                                                                                          |
| $G.Size_{Brood}$      | Number of adults in the natal group at initiation of incubation                                                        |
| $G.Size_{90}$         | Average number of adults in the natal group between fledge and nutritional independence at 90 days of age              |
| $G.Size_{BrSeas}$     | Average number of adults in the natal group over the breeding season                                                   |
| $Mass_{11}$           | Nestling body mass (0.1 g) collected 11 days after hatching                                                            |
| $Mass_{90}$           | (Average) body mass data (0.1 g) collected from 90 ( $\pm 15$ ) day-old birds                                          |
| $\Delta M_{b,Juv}$    | Change in juvenile body mass (g), calculated as $Mass_{90} - Mass_{11}$                                                |
| $Mass_{Oct}$          | (Average) body mass data (0.1 g) collected from adults at the beginning of the breeding season (September and October) |
| $Mass_{Mar}$          | (Average) body data (0.1 g) collected from adults at the end of the breeding season (February and March)               |
| $\Delta M_{b,Adults}$ | Change in adult body mass (g), calculated as $Mass_{Mar} - Mass_{Oct}$                                                 |
| $Mean T_{maxBrood}$   | Average daily maximum temperatures between hatching and fledging                                                       |
| $Mean T_{max90}$      | Average daily maximum temperatures between fledging and nutritional independence at 90 days of age                     |
| $Mean T_{maxBrSeas}$  | Average daily maximum temperatures between the start (September) and the end (March) of the breeding season            |
| $Rain_{60}$           | Total rainfall in the 60 days prior to initiation of incubation at the nest from which each individual fledged         |
| $Rain_{90}$           | Total rainfall between fledging and nutritional independence at 90 days of age                                         |
| $Rain_{BrSeas}$       | Total rainfall between the start (September) and the end (March) of the breeding season                                |
| $Drought_{BrSeas}$    | Occurrence of a meteorological drought (rainfall < 135.75 mm) within the breeding season                               |

Caption: The grey boxes below show the breeding seasons within which data were collected. All the climate-related predictor variables were collected during Breeding Season<sub>(t)</sub> and used in models testing variation in body mass change within the same Breeding Season<sub>(t)</sub> and interannual survival into the following Breeding Season<sub>(t+1)</sub>.

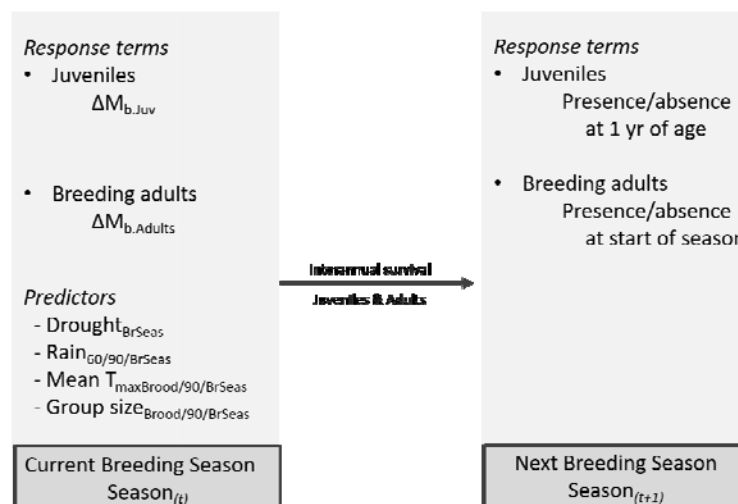

## Statistical analyses

Statistical analyses were conducted in R v 3.4.1 (R Core Team 2017). Mixed effects models, using the package *lme4* (Bates *et al.* 2015), were used for all analyses, see Box 1. Model selection with Akaike's information criterion corrected for small sample size (AICc) was used to explore a series of models to determine which parameters best explained patterns of variation in the data (Symonds & Moussalli 2011; Harrison *et al.* 2018). Where multiple models were within 5 AICc of the top model, top model sets were averaged using the package *MuMin* (Barton 2015) and we present parameter estimates for interpretation after model averaging (Burnham & Anderson 2002; Grueber *et al.* 2011). All continuous explanatory variables were scaled by centering and standardising by the mean (Schielezeth 2010; Harrison *et al.* 2018). All explanatory variables were tested for correlation with one another (all VIF < 2 for pairs of continuous predictors, Fox & Monette 1992). Rainfall measures were always highly correlated with drought ( $F_{1,247-350} > 37.611$ ,  $p < 0.001$ ), and therefore rainfall and drought were not included in the same additive models (Harrison *et al.* 2018). Linear model fits were checked using normal Q-Q plots and histograms of residuals. Binomial model fits were checked for overdispersion in the *RVAideMemoire* package (Herve 2019) and for zero-inflation in the *DHARMA* package (Hartig 2020). Model terms with confidence intervals not intersecting zero were considered to explain significant patterns in the data (Grueber, Nakagawa, Laws, & Jamieson, 2011). Sample sizes reflect datasets after removing records containing missing values. Unless otherwise indicated, summary statistics are presented as mean  $\pm$  one standard deviation.

Interactions between group size and climatic effects on  $\Delta M_b$  and survival would be consistent with a buffering effect of group size. We conducted sensitivity power analyses to identify the minimum determinable effect of two-way interactions given our sample sizes (Cohen

1988; Greenland *et al.* 2016). Assuming a fourfold increase in required sample size to adequately detect interactions in mixed-effects linear regression models (Leon & Heo 2009), we confirmed sufficient sample size to detect 1) small to moderate main effects in all analyses (Cohen's  $f^2 \leq 0.12$  in all cases), 2) moderate to very large effects of two-way interactions in  $\Delta M_b$  analyses ( $f^2 = 0.28$  for fledglings,  $f^2 = 0.54$  for adults), and 3) small to moderate effects of two-way interactions in interannual survival analyses ( $f^2 \leq 0.14$  for juveniles,  $f^2 = 0.09$  for breeding adults).

Where interannual survival probabilities for juveniles and breeding adults were influenced by interactions, we used the package *lsmeans* (Lenth 2016) to predict survival probabilities based on different values of the interacting factors.

*Body mass change:* To determine which variables explained  $\Delta M_{b,Juv}$  and  $\Delta M_{b,Adults}$ , we used maximum likelihood linear mixed-effects models (LMMs). For  $\Delta M_{b,Juv}$  ( $n = 124$ ), we considered the influence of  $G.Size_{90}$ ,  $Drought_{BrSeas}$ ,  $Rain_{60}$ ,  $Rain_{90}$ , mean  $T_{max90}$ , sex, brood size, and the interactions among climate variables and group size. Brood identity nested within group identity were included as random terms to account for repeated measures. For  $\Delta M_{b,Adults}$  ( $n = 82$  measurements from 53 different individuals), we considered the influence  $G.Size_{BrSeas}$ ,  $Drought_{BrSeas}$ ,  $Rain_{BrSeas}$ , mean  $T_{maxBrSeas}$ , age (in days since hatching), sex, and the interactions among climate variables and group size. Individual identity nested within group identity were included as random terms.

*Survival:* Non-monitoring periods over winter prevented detailed time-step survival analyses, such as Cox proportional hazards models (Cox 1972; Austin 2017; Guindre-Parker & Rubenstein 2020), for both juveniles and adults. Therefore, to determine which variables explained interannual survival of known individuals in the study population, we used generalised

linear mixed-effects models (GLMMs) with a binomial distribution (survival to next breeding season = yes/no) and a logit link function.

*Juveniles:* For juvenile birds, interannual survival was measured as survival from nutritional independence to one year of age ( $\pm 15$  days; recorded in the following breeding season – see Box 1). The factors that influence pied babbler survival probabilities are not constant across time during early development (Bourne *et al.* n.d.; Ridley 2016), and conditions experienced in the nest can carry over to influence survival probabilities later (Harrison *et al.* 2011; Auer & Martin 2017; Moore & Martin 2019). We therefore conducted separate analyses specifically considering climate and social factors experienced in the nest and after fledging. For survival to one year, we considered the influence of (a)  $G.Size_{Brood}$ ,  $Rain_{60}$ ,  $Drought_{BrSeas}$ , mean  $T_{maxBrood}$ , sex,  $Mass_{11}$ , brood size, and the two way interactions amongst all group size and climate variables (i.e. conditions between hatching and fledging;  $n = 247$  individuals); and (b)  $G.Size_{90}$ ,  $Rain_{90}$ ,  $Drought_{BrSeas}$ , mean  $T_{max90}$ , sex,  $Mass_{11}$ , brood size, and the two way interactions among all group size and climate variables (i.e. conditions between fledging and nutritional independence;  $n = 229$  individuals). Brood identity nested within natal group identity were included as random terms in both analyses.

*Breeding adults:* For breeding adults, interannual survival was measured from the end of a breeding season in which they attempted to breed to the beginning of the subsequent breeding season (see Box 1). For interannual survival ( $n = 352$  records from 136 different adults), we considered the influence of  $G.Size_{BrSeas}$ ,  $Drought_{BrSeas}$ ,  $Rain_{BrSeas}$ , Mean  $T_{maxBrSeas}$ , age, sex, and the two way interactions among all group size and climate



variables. Individual identity nested within group identity were included as random terms.

We tested for the influence of  $\Delta M_b$  on interannual survival probabilities for both age classes separately, using univariate binomial GLMMs with a logit link function, due to much smaller sample sizes for body mass than for presence/absence data.

## **Results**

Annual average summer maximum temperature at the study site from 2005–2019 was  $34.2 \pm 0.9$  °C (range: 32.4–36.5 °C), summer rainfall averaged  $185.4 \pm 86.2$  mm (range: 64.4–352.1 mm), and droughts occurred in 5 of 14 breeding seasons studied (Fig. 1A). Group size varied between groups and breeding seasons, averaging  $4.2 \pm 1.4$  adults per group across all breeding seasons (range: 2–9 adults; Fig. 1B), but did not differ significantly between drought and not-drought years ( $F_{1,164} = 0.754$ ,  $p = 0.387$ ). Between 2005 and 2019, the largest group averaged  $5.4 \pm 2.3$  adult group members (range across 11 breeding seasons: 2.3–9), while the smallest group averaged  $3.3 \pm 0.9$  members (range across 12 breeding seasons: 2–5).

### *Change in body mass*

Fledglings that survived to 90 days were heavier as nestlings (mean  $Mass_{11} = 40.0 \pm 5.5$  g,  $n = 270$ ) than those that did not survive ( $37.4 \pm 7.3$  g,  $n = 295$ ; LMM with brood identity as the random term: Est =  $2.403 \pm 0.526$ ,  $t = 4.566$ , 95% CI 1.371, 3.437). Individuals gained significantly more mass between fledging and independence during wetter periods, and when they were raised in larger broods (Table 1A, Fig. 2A, Fig. 2B).  $\Delta M_{b,Juv}$  did not vary significantly with sex, group size or temperature between fledging and independence, nor did we find evidence of significant interactions among climate and group size variables (Table S1).

High temperatures and low rainfall during the breeding season were associated with body mass loss between the start and the end of the breeding season in breeding adults (Table 1B; Fig. 2C, Fig. 2D).  $\Delta M_{b,Adults}$  did not vary significantly with sex or group size, after model averaging, and nor did we find evidence of significant interactions among climate and group size variables (Table S2). Age was not associated with variation in  $\Delta M_{b,Adults}$  in a subset of 36 individuals of known age (Table S3) and we therefore excluded age from the models analysing our full dataset presented here.

### *Survival: juveniles*

Of 596 nestlings of known  $Mass_{11}$ , 254 (42.6%) survived to nutritional independence. Of these, 173 (68.1%) were present in the study population one year post-hatching. Natal group size ranged from 2–9 adults (mean =  $4.4 \pm 1.5$ ). The likelihood of a juvenile surviving to one year of age increased as  $Rain_{60}$  increased (Table 1C, Fig. 3A). However, juveniles that experienced high mean  $T_{maxBrood}$  were less likely to survive to one year of age (Table 1C, Fig. 3B; see Table S4 for full model selection output).

Juveniles were also less likely to survive to one year of age when they were exposed to high mean  $T_{max90}$  and  $Drought_{BrSeas}$ . The effect of  $Drought_{BrSeas}$  on juvenile survival to one year of age was influenced by temperature: mean probability of survival was high ( $0.90 \pm 0.05$ ) when juvenile birds experienced both  $Drought_{BrSeas}$  and relatively cool mean  $T_{max90}$ , whereas mean probability of survival was very low ( $0.12 \pm 0.08$ ) when juvenile birds experienced both  $Drought_{BrSeas}$  and high mean  $T_{max90}$  (Table 1D, Fig. 3C). This represents a more than seven-fold decrease in survival when individuals experienced both drought and high temperatures as dependent fledglings, compared to when drought occurred but temperatures were mild. Survival to one year of age did not vary significantly with  $Mass_{11}$ , sex, brood size, or group size in either

analysis. Survival to one year of age was also not significantly influenced by interactions between group size and environmental conditions (see Tables S4–S5 for full model selection output). Survival to one year of age was not associated with  $\Delta M_{b,Juv}$  (GLMM: Est =  $0.041 \pm 0.037$ ,  $z = 1.106$ , 95% CI: -0.039, 0.081).

### *Survival: breeding adults*

In 264 out of 352 records of interannual survival (75%; from 136 different individuals), breeding adults were still present at the start of the next breeding season. Breeding adults were less likely to be present at the start of the next breeding season when they had experienced  $Drought_{BrSeas}$  (Table 1E). The effect of  $Drought_{BrSeas}$  on the survival of breeding adults was influenced by temperature: mean probability of survival was high ( $0.81 \pm 0.06$ ) when individuals had experienced  $Drought_{BrSeas}$  alongside relatively cool mean  $T_{maxBrSeas}$ . However, mean probability of survival was low ( $0.32 \pm 0.09$ ; Table 1E, Fig. 4) when individuals experienced both drought conditions alongside high mean  $T_{maxBrSeas}$ , representing a more than 50% decrease in survival of breeding adults from one year to the next compared to when drought occurred but temperatures were mild. Interannual survival of breeding adults did not vary significantly with sex or group size, nor did we find evidence of significant interactions among climate and group size variables (see Table S6 for full model selection output). Age was not associated with variation in survival in a subset of 58 individuals of known age (Table S7) and we therefore excluded age from the models analysing our full dataset presented here. The probability of breeding adults surviving to the start of the next breeding season was not associated with  $\Delta M_{b,Adults}$  (GLMM, Est =  $0.031 \pm 0.071$ ,  $z = 0.436$ , 95% CI: -0.111, 0.171).

## Discussion

We investigated the potential for group size to buffer against the impacts of climatic factors on  $\Delta M_b$  and interannual survival in a cooperatively breeding bird. We found that measures of  $\Delta M_b$  and survival for individuals in larger groups were not affected differently by high temperatures and drought compared to those in smaller groups. Environmental conditions significantly affected  $\Delta M_b$  and interannual survival in both juveniles and breeding adults across all group sizes, a finding that contributes to a rapidly growing body of literature (Overpeck 2013; Allen *et al.* 2015; Cruz-McDonnell & Wolf 2016) demonstrating that high temperatures and prolonged periods of low rainfall negatively impact on survival in a range of species.

Exposure to high temperatures and low rainfall was strongly associated with reduced growth in juvenile pied babblers and body mass loss in breeding adults. Body mass performs well as an index of condition (Labocha & Hayes 2012), particularly when change *within* individuals is measured over time, and poor body condition has been linked to reduced survival in both adult birds (e.g. Gardner *et al.* 2018) and nestlings (e.g. Todd *et al.* 2003; Schwagmeyer & Mock 2008). In our study population, in a simple univariate assessment, the within-individual  $\Delta M_b$  we recorded did not appear to be significantly associated with interannual survival in either juvenile or breeding adult pied babblers, at least over our measurement windows, suggesting that reduced survival is not a consequence of body mass loss/reduced growth.

In pied babblers, exposure to chronic, sublethal effects of high temperatures and low rainfall within the same breeding season are associated with increased risk of overwinter mortality. Hot and dry conditions experienced by juvenile pied babblers between fledging and independence were associated with lower probability of survival to one year of age. Lower survival probabilities result in reduced recruitment into the adult population. Hot and dry

conditions were also associated with strongly reduced likelihood of interannual survival in breeding adults. Together these processes likely contribute to the overall trend for population decline in below-average rainfall years in this species (Wiley 2017). Negative effects of adverse climate conditions on the interannual survival of breeding adults are particularly concerning because interannual survival rates of breeding adults (compared to non-breeding adult helpers) have the greatest impact on population growth rates in this species (Wiley 2017), and hence the probability of population persistence through time (Layton-Matthews *et al.* 2018).

Droughts are currently a regular, natural feature of the local climate (Tokura *et al.* 2018). Temperatures in the region have increased in recent decades (van Wilgen *et al.* 2016) and will continue to do so (IPCC 2013), and therefore an increase in the frequency of hot droughts can be expected. If this occurs, pied babbler populations are likely to decline as altered drought regimes reduce opportunities for population recovery following hot drought events. Consecutive years characterised by exceptionally hot and dry conditions could lead to failed recruitment and population crashes, as has been observed in *Athene cunicularia* burrowing owls (Cruz-McDonnell & Wolf 2016) and is predicted for pied babblers (Wiley 2017; Conradie *et al.* 2019).

Group size did not buffer the impacts of hot, dry weather on individual body mass change or survival in juveniles or breeding adults, since birds across all group sizes were similarly affected. This is consistent with the findings of two concurrent studies on a cooperatively-breeding mammal (van de Ven *et al.* 2019a) and a cooperatively breeding bird (Guindre-Parker & Rubenstein 2020). Adverse effects of climatic conditions on  $\Delta M_b$  and survival are therefore likely driven primarily by physiological tolerance limits (Smit *et al.* 2018) and resource constraints (Nowakowski *et al.* 2018) acting on individuals, irrespective of the number of individuals present in their social group. Benefits of group living and cooperation,

including load-lightening and the production of more surviving young by larger groups, have been observed in pied babblers previously (Ridley 2016; Wiley & Ridley 2016; Bourne *et al.* 2020). Yet we show here that larger group sizes did not moderate the influence of high temperatures and drought on body mass change or survival. While it is possible that the benefits of larger group sizes and the presence of helpers may have previously helped to mitigate the effects of adverse environmental conditions (Jetz & Rubenstein 2011; Russell 2016; Cornwallis *et al.* 2017), it appears that any such advantage is no longer detectable given current extreme conditions and a rapidly changing climate. Buffering effects of group size may be detectable in reproductive outputs rather than measures of mass change and survival, although see Bourne *et al.* (n.d.) which suggests that this is not the case in pied babblers.

The Intergovernmental Panel on Climate Change predicts that the incidence of hot and dry extremes will continue to become more frequent over most land masses (IPCC 2013). In arid and semi-arid regions already affected by both decreased precipitation and increased warming, interannual survival and recruitment in resident avian species (such as this population of pied babblers) may be insufficient to allow for population recovery between hot droughts. Taken together with our finding that larger group sizes did not buffer pied babblers against adverse climatic conditions, our data raise concerns for the long-term persistence of arid-zone species in the face of changing climatic conditions. The adaptive benefits of cooperative life history strategies in highly variable environments are unlikely to be sufficient to counteract the impacts of rapidly changing climatic conditions, in particular the increased frequency of climate extremes such as heat waves and drought.

## **Acknowledgements**

We thank the management teams at the Kuruman River Reserve (KRR) and surrounding farms, Van Zylsrus, South Africa, for making the work possible. The KRR was financed by the Universities of Cambridge and Zurich, the MAVA Foundation, and the European Research Council (Grant No. 294494 to Tim Clutton-Brock), and received logistical support from the Mammal Research Institute of the University of Pretoria. We thank Sello Matjee, Paige Ezzey, and Lesedi Moagi for fieldwork assistance during 2016–2019, and all past and present staff and students of the Pied Babbler Research Project for data collected since 2003. Dr Todd Erickson provided valuable comments on an early draft. This work was funded by the DST-NRF Centre of Excellence at the FitzPatrick Institute for African Ornithology, the University of Cape Town, the Oppenheimer Memorial Trust (Grant No. 20747/01 to ARB), the British Ornithologists' Union, the Australian Research Council (Grant No. FT110100188 to ARR), a BBSRC David Phillips Fellowship (BB/J014109/1 to CNS), and the National Research Foundation of South Africa (Grant No. 110506 to SJC). The opinions, findings and conclusions are those of the authors alone, and the National Research Foundation accepts no liability whatsoever in this regard. We thank the three knowledgeable anonymous reviewers for their constructive comments which helped to improve this work tremendously.

## **References**

- Allen, C.D., Breshears, D.D. & McDowell, N.G. (2015). On underestimation of global vulnerability to tree mortality and forest die-off from hotter drought in the Anthropocene. *Ecosphere*, 6, 1–55.
- Auer, S.K. & Martin, T.E. (2017). Parental care mitigates carry-over effects of poor early

443 conditions on offspring growth. *Behav. Ecol.*, 28, 1176–1182.

444 Austin, P.C. (2017). A tutorial on multilevel survival analysis: methods, models and applications.

445 *Int. Stat. Rev.*, 85, 185–203.

446 Barton, K. (2015). *MuMIn: Multi-model inference*. Available at: [https://cran.r-](https://cran.r-project.org/package=MuMin)

447 [project.org/package=MuMin](https://cran.r-project.org/package=MuMin). Last accessed 1 June 2020.

448 Bates, D., Maechler, M., Bolker, B. & Walker, S. (2015). Fitting linear mixed effects models

449 using lme4. *J. Stat. Softw.*, 67, 1–48.

450 Bourne, A.R., Cunningham, S.J., Nupen, L.J., McKechnie, A.E. & Ridley, A.R. (2018). *Male*

451 *and female Southern Pied Babbler Turdoides bicolor nestlings respond similarly to heat*

452 *stress*. Available at: [https://www.bou.org.uk/wp-content/uploads/2019/08/bou-funded-](https://www.bou.org.uk/wp-content/uploads/2019/08/bou-funded-project-report-bourne.pdf)

453 [project-report-bourne.pdf](https://www.bou.org.uk/wp-content/uploads/2019/08/bou-funded-project-report-bourne.pdf). Last accessed 1 June 2020.

454 Bourne, A.R., Cunningham, S.J., Spottiswoode, C.N. & Ridley, A.R. (2020). Compensatory

455 breeding in years following drought in a desert-dwelling cooperative breeder. *Front. Ecol.*

456 *Evol. DOI: 10.3389/fevo.2020.00190*

457 Bourne, A.R., Cunningham, S.J., Spottiswoode, C.N. & Ridley, A.R. (under review). High

458 temperatures drive offspring mortality in a cooperatively breeding bird. *Proc. R. Soc.*

459 *London Biol. Sci.*

460 Bourne, A.R., McKechnie, A.E., Cunningham, S.J., Ridley, A.R., Woodborne, S.M. & Karasov,

461 W.H. (2019). Non-invasive measurement of metabolic rates in wild, free-living birds

462 using doubly labelled water. *Funct. Ecol.*, 33, 162–174.

463 Burnham, K.P. & Anderson, D.R. (2002). *Model selection and multimodel inference: a practical*



*information-theoretic approach*. Springer Verlag, New York.

Camacho, A., Rusch, T., Ray, G., Telemeco, R.S., Rodrigues, M.T. & Angilletta, M.J. (2018).

Measuring behavioral thermal tolerance to address hot topics in ecology, evolution, and conservation. *J. Therm. Biol.*, 73, 71–79.

Clutton-Brock, T.H., Russell, A.F. & Sharpe, L.L. (2004). Behavioural tactics of breeders in

cooperative meerkats. *Anim. Behav.*, 68, 1029–1040.

Cohen, J. (1988). *Statistical power analysis for the behavioral sciences*. 2nd Editio. Lawrence

Erlbam Associates, New York.

Conradie, S., Woodborne, S.M., Cunningham, S.J. & McKechnie, A.E. (2019). Chronic,

sublethal effects of high temperatures will cause severe declines in southern African arid-zone birds during the 21st century. *Proc. Natl. Acad. Sci.*, 116, 14065–14070.

Cornwallis, C.K., Botero, C.A., Rubenstein, D.R., Downing, P.A., West, S.A. & Griffin, A.S.

(2017). Cooperation facilitates the colonization of harsh environments. *Nat. Ecol. Evol.*, 1, 0057.

Cox, D.R. (1972). Regression models and life-tables. *J. R. Stat. Soc.*, 34, 187–220.

Crick, H.P. (1992). Load-lightening in cooperatively breeding birds and the cost of reproduction.

*Ibis (Lond. 1859)*, 1, 56–61.

Cruz-McDonnell, K.K. & Wolf, B.O. (2016). Rapid warming and drought negatively impact

population size and reproductive dynamics of an avian predator in the arid southwest. *Glob.*

*Chang. Biol.*, 22, 237–253.

Cumming, G.S. & Bernard, R.T.F. (1997). Rainfall, food abundance and timing of parturition in

African bats. *Oecologia*, 111, 309–317.

Cunningham, S.J., Martin, R.O., Hojem, C.L. & Hockey, P.A.R. (2013). Temperatures in excess of critical thresholds threaten nestling growth and survival in a rapidly-warming arid savanna: a study of common fiscals. *PLoS One*, 8, e74613.

Ebensperger, L.A., Correa, L.A., León, C., Ramírez-Estrada, J., Abades, S., Villegas, Á., *et al.* (2016). The modulating role of group stability on fitness effects of group size is different in females and males of a communally rearing rodent. *J. Anim. Ecol.*, 85, 1502–1515.

Feng, S. & Fu, Q. (2013). Expansion of global drylands under a warming climate. *Atmos. Chem. Phys.*, 13, 10081–10094.

Fox, J. & Monette, G. (1992). Generalised collinearity diagnostics. *J. Am. Stat. Assoc.*, 87, 178–183.

Fridolfsson, A.-K. & Ellegren, H. (1999). A simple and universal method for molecular sexing of non-ratite birds. *J. Avian Biol.*, 30, 116–121.

Gardner, J.L., Rowley, E., Rebeira, P. De, Rebeira, A. De & Brouwer, L. (2018). Associations between changing climate and body condition over decades in two southern hemisphere passerine birds. *Clim. Chang. Responses*, 5, 1–14.

Golabek, K., Ridley, A.R. & Radford, A. (2012). Food availability affects strength of seasonal territorial behaviour in a cooperatively breeding bird. *Anim. Behav.*, 83, 613–619.

Greenland, S., Senn, S.J., Rothman, K.J., Carlin, J.B., Poole, C., Goodman, S.N., *et al.* (2016). Statistical tests, P values, confidence intervals, and power: a guide to misinterpretations. *Eur. J. Epidemiol.*, 31, 337–350.

- Griesser, M., Drobniak, S.M., Nakagawa, S. & Botero, C.A. (2017). Family living sets the stage for cooperative breeding and ecological resilience in birds. *PLOS Biol.*, 15, e2000483.
- Grueber, C.E., Nakagawa, S., Laws, R.S. & Jamieson, I.G. (2011). Multimodal inference in ecology and evolution: challenges and solution. *J. Evol. Biol.*, 24, 699–711.
- Guindre-Parker, S. & Rubenstein, D.R. (2018). The oxidative costs of parental care in cooperative and pair-breeding African starlings. *Oecologia*, 188, 53–63.
- Guindre-Parker, S. & Rubenstein, D.R. (2020). Survival benefits of group living in a fluctuating environment. *Am. Nat.*, In press.
- Harrison, X.A., Blount, J.D., Inger, R., Norris, D.R. & Bearhop, S. (2011). Carry-over effects as drivers of fitness differences in animals. *J. Anim. Ecol.*, 80, 4–18.
- Harrison, X.A., Donaldson, L., Correa-cano, M.E., Evans, J., Fisher, D.N., Goodwin, C.E.D., *et al.* (2018). A brief introduction to mixed effects modelling and multi-model inference in ecology. *Peer J*, 6, 1–32.
- Hartig, F. (2020). *DHARMA: residual diagnostics for hierarchical (multi-level / mixed) regression model*. *cran.R-project.org*. Available at: <https://cran.r-project.org/package=DHARMA>. Last accessed 4 March 2020.
- Hatchwell, B.J. (1999). Investment strategies of breeders in avian cooperative breeding systems. *Am. Nat.*, 154, 205–219.
- Herve, M. (2019). *RVAideMemoire: testing and plotting procedures for biostatistics*. *cran.R-project.org*. Available at: <https://cran.r-project.org/package=RVAideMemoire>. Last accessed 4 March 2020.

527 Hockey, P.A.R., Dean, W.R.J. & Ryan, P.G. (2005). *Roberts' Birds of Southern Africa, 7th*  
528 *Edition*. 7th edn. John Voleker Bird Book Fund, Cape Town.

529 Humphries, D.J. (2013). The mechanisms and function of social recognition in the cooperatively  
530 breeding Southern pied babbler, *Turdoides bicolor*. PhD Thesis, MacQuarie University.

531 Iknayan, K.J. & Beissinger, S.R. (2018). Collapse of a desert bird community over the past  
532 century driven by climate change. *Proc. Natl. Acad. Sci.*, 115, 8597–8602.

533 IPCC. (2013). *Climate Change 2013: The Intergovernmental Panel on Climate Change fifth*  
534 *assessment report*. Cambridge University Press, Cambridge.

535 Jetz, W. & Rubenstein, D.R. (2011). Environmental uncertainty and the biogeography of  
536 cooperative breeding in birds. *Curr. Biol.*, 21, 72–78.

537 Kruger, A.C. & Sekele, S.S. (2013). Trends in extreme temperature indices in South Africa:  
538 1962-2009. *Int. J. Climatol.*, 33, 661–676.

539 Labocha, M.K. & Hayes, J.P. (2012). Morphometric indices of body condition in birds: a review.  
540 *J. Ornithol.*, 153, 1–22.

541 Langmore, N.E., Bailey, L.D., Heinsohn, R.G., Russell, A.F. & Kilner, R.M. (2016). Egg size  
542 investment in superb fairy-wrens: helper effects are modulated by climate. *Proc. R. Soc. B*,  
543 283, 10–12.

544 Layton-Matthews, K., Ozgul, A. & Griesser, M. (2018). The interacting effects of forestry and  
545 climate change on the demography of a group-living bird population. *Oecologia*, 186, 907–  
546 918.

547 Lenth, R. V. (2016). Least-squares means: the R package lsmeans. *J. Stat. Softw.*, 69, 1–33.

548 Leon, A.C. & Heo, M. (2009). Sample sizes required to detect interactions between two binary  
549 fixed-effects in a mixed-effects linear regression model. *Comput. Stat. Data Anal.*, 53, 603–  
550 608.

551 Lukas, D. & Clutton-Brock, T. (2017). Climate and the distribution of cooperative breeding in  
552 mammals. *R. Soc. Open Sci.*, 4, 160897.

553 MacKellar, N., New, M. & Jack, C. (2014). Observed and modelled trends in rainfall and  
554 temperature for South Africa: 1960-2010. *S. Afr. J. Sci.*, 110, 1–13.

555 Markham, A.C., Gesquiere, L.R., Alberts, S.C. & Altmann, J. (2015). Optimal group size in a  
556 highly social mammal. *Proc. Natl. Acad. Sci.*, 112, 4882–4887.

557 Mayaud, J.R., Bailey, R.M. & Wiggs, G.F.S. (2017). Modelled responses of the Kalahari Desert  
558 to 21st century climate and land use change. *Sci. Rep.*, 7, 3887–3898.

559 McKechnie, A.E., Hockey, P.A.R. & Wolf, B.O. (2012). Feeling the heat: Australian landbirds  
560 and climate change. *Emu*, 112, i–vii.

561 McKechnie, A.E., Smit, B., Whitfield, M.C., Noakes, M.J., Talbot, W.A., Garcia, M., *et al.*  
562 (2016). Avian thermoregulation in the heat: evaporative cooling capacity in an archetypal  
563 desert specialist, Burchell’s sandgrouse (*Pterocles burchelli*). *J. Exp. Biol.*, 219, 2137–2144.

564 McKechnie, A.E. & Wolf, B.O. (2010). Climate change increases the likelihood of catastrophic  
565 avian mortality events during extreme heat waves. *Biol. Lett.*, 6, 253–6.

566 Meade, J., Nam, K.B., Beckerman, A.P. & Hatchwell, B.J. (2010). Consequences of “load-  
567 lightening” for future indirect fitness gains by helpers in a cooperatively breeding bird. *J.*  
568 *Anim. Ecol.*, 79, 529–537.

569 Moore, M.P. & Martin, R.A. (2019). On the evolution of carry-over effects. *J. Anim. Ecol.*, 88,  
570 1832–1844.

571 Mumme, R.L., Bowman, R., Pruett, M.S. & Fitzpatrick, J.W. (2015). Natal territory size, group  
572 size, and body mass affect lifetime fitness in the cooperatively breeding Florida scrubjays.  
573 *Auk*, 132, 634–646.

574 Nelson-Flower, M.J., Hockey, P.A.R., O’Ryan, C., Raihani, N.J., Du Plessis, M.A. & Ridley,  
575 A.R. (2011). Monogamous dominant pairs monopolize reproduction in the cooperatively  
576 breeding pied babbler. *Behav. Ecol.*, 22, 559–565.

577 Nelson-Flower, M.J., Wiley, E.M., Flower, T.P. & Ridley, A.R. (2018). Individual dispersal  
578 delays in a cooperative breeder: ecological constraints, the benefits of philopatry and the  
579 social queue for dominance. *J. Anim. Ecol.*, 87, 1227–1238.

580 New, M., Hewitson, B., Stephenson, D.B., Tsiga, A., Kruger, A., Manhique, A., *et al.* (2006).  
581 Evidence in trends in daily climate extremes over southern and west Africa. *J. Geophys.*  
582 *Res.*, 111, D14102.

583 Nowakowski, A.J., Frishkoff, L.O., Agha, M., Todd, B.D. & Scheffers, B.R. (2018). Changing  
584 thermal landscapes: merging climate science and landscape ecology through thermal  
585 biology. *Curr. Landsc. Ecol. Reports*, 3, 57–72.

586 O’Connor, R.S., Wolf, B.O., Brigham, R.M. & McKechnie, A.E. (2017). Avian  
587 thermoregulation in the heat: efficient evaporative cooling in two southern African  
588 nightjars. *J. Comp. Physiol. B Biochem. Syst. Environ. Physiol.*, 187, 477–491.

589 Overpeck, J. (2013). The challenge of hot droughts. *Nature*, 503, 350–351.

- Paniw, M., Maag, N., Cozzi, G., Clutton-Brock, T. & Ozgul, A. (2019). Life history responses of meerkats to seasonal changes in extreme environments. *Science* (80-. ), 363, 631–635.
- Paquet, M., Doutrelant, C., Loubon, M., Theron, F., Rat, M. & Covas, R. (2016). Communal roosting, thermoregulatory benefits and breeding group size predictability in cooperatively breeding sociable weavers. *J. Avian Biol.*, 47, 749–755.
- du Plessis, K.L., Martin, R.O., Hockey, P.A.R., Cunningham, S.J. & Ridley, A.R. (2012). The costs of keeping cool in a warming world: Implications of high temperatures for foraging, thermoregulation and body condition of an arid-zone bird. *Glob. Chang. Biol.*, 18, 3063–3070.
- R Core Team. (2017). *R: a language and environment for statistical computing*. *R Found. Stat. Comput.* R Foundation for Statistical Computing, Vienna.
- Raihani, N.J., Nelson-Flower, M.J., Golabek, K.A. & Ridley, A.R. (2010). Routes to breeding in cooperatively breeding pied babblers *Turdoides bicolor*. *J. Avian Biol.*, 41, 681–686.
- Raihani, N.J. & Ridley, A.R. (2007). Variable fledging age according to group size: trade-offs in a cooperatively breeding bird. *Biol. Lett.*, 3, 624–627.
- Rey, B., Fuller, A., Mitchell, D., Meyer, L.C.R. & Hetem, R.S. (2017). Drought-induced starvation of aardvarks in the Kalahari: an indirect effect of climate change. *Biol. Lett.*, 13, 20170301.
- Ridley, A.R. (2016). Southern pied babblers: The dynamics of conflict and cooperation in a group-living society. In: *Cooperative Breeding in Vertebrates: Studies of Ecology, Evolution, and Behavior* (eds. Dickinson, J.L. & Koenig, W.). Cambridge University Press,

Cambridge, pp. 115–132.

Ridley, A.R. & Child, M.F. (2009). Specific targeting of host individuals by a kleptoparasitic bird. *Behav. Ecol. Sociobiol.*, 63, 1119–1126.

Ridley, A.R. & Raihani, N.J. (2007). Variable postfledging care in a cooperative bird: causes and consequences. *Behav. Ecol.*, 18, 994–1000.

Ridley, A.R. & Raihani, N.J. (2008). Task partitioning increases reproductive output in a cooperative bird. *Behav. Ecol.*, 19, 1136–1142.

Ridley, A.R., Raihani, N.J. & Nelson-Flower, M.J. (2008). The cost of being alone: the fate of floaters in a population of cooperatively breeding pied babblers. *J. Avian Biol.*, 39, 389–392.

Rubenstein, D.R. (2011). Spatiotemporal environmental variation, risk aversion, and the evolution of cooperative breeding as a bet-hedging strategy. *Proc. Natl. Acad. Sci.*, 108, 10816–10822.

Rubenstein, D.R. & Lovette, I.J. (2007). Temporal environmental variability drives the evolution of cooperative breeding in birds. *Curr. Biol.*, 17, 1414–1419.

Russell, A.F. (2016). Chestnut-crowned babblers: dealing with climatic adversity and uncertainty in the Australian arid zone. In: *Cooperative Breeding in Vertebrates* (eds. Koenig, W.D. & Dickinson, J.L.). Cornell University, New York.

Schielzeth, H. (2010). Simple means to improve the interpretability of regression coefficients. *Methods Ecol. Evol.*, 1, 103–113.

Schwagmeyer, P.L. & Mock, D.W. (2008). Parental provisioning and offspring fitness: size



632 matters. *Anim. Behav.*, 75, 291–298.

633 Shen, S.-F., Emlen, S.T., Koenig, W.D. & Rubenstein, D.R. (2017). The ecology of cooperative  
634 breeding behaviour. *Ecol. Lett.*, 20, 708–720.

635 Sinervo, B., Méndez-de-la-Cruz, F., Miles, D., Heulin, B., Bastiaans, E., Villagrán-Santa Cruz,  
636 M., *et al.* (2010). Erosion of lizard diversity by climate change and altered thermal niches.  
637 *Science* (80-. ), 328, 894–899.

638 Smit, B., Whitfield, M.C., Talbot, W.A., Gerson, A.R., McKechnie, A.E. & Wolf, B.O. (2018).  
639 Avian thermoregulation in the heat: phylogenetic variation among avian orders in  
640 evaporative cooling capacity and heat tolerance. *J. Exp. Biol.*, 221, jeb174870.

641 Spooner, F.E.B., Pearson, R.G. & Freeman, R. (2018). Rapid warming is associated with  
642 population decline among terrestrial birds and mammals globally. *Glob. Chang. Biol.*, 24,  
643 4521–4531.

644 Sunday, J.M., Bates, A.E., Kearney, M.R., Colwell, R.K., Dulvy, N.K., Longino, J.T., *et al.*  
645 (2014). Thermal-safety margins and the necessity of thermoregulatory behavior across  
646 latitude and elevation. *Proc. Natl. Acad. Sci.*, 111, 5610–5615.

647 Symonds, M.R.E. & Moussalli, A. (2011). A brief guide to model selection, multimodel  
648 inference and model averaging in behavioural ecology using Akaike’s information criterion.  
649 *Behav. Ecol. Sociobiol.*, 65, 13–21.

650 Thompson, A.M., Raihani, N.J., Hockey, P.A.R., Britton, A., Finch, F.M. & Ridley, A.R. (2013).  
651 The influence of fledgling location on adult provisioning: a test of the blackmail hypothesis.  
652 *Proc. Biol. Sci.*, 280, 20130558.

653 Todd, L.D., Poulin, R.G., Wellicome, T.I. & Brigham, R.M. (2003). Post-fledging survival of  
654 burrowing owls in Saskatchewan. *J. Wildl. Manage.*, 67, 512–519.

655 Tokura, W., Jack, S.L., Anderson, T. & Hoffman, M.T. (2018). Long-term variability in  
656 vegetation productivity in relation to rainfall, herbivory, and fire in Tswalu Kalahari  
657 Reserve. *Koedoe*, 60, 1–18.

658 van de Ven, T.M.F.N. (2017). Implications of climate change on the reproductive success of the  
659 southern yellow-billed hornbill *Tockus leucomelas*. PhD thesis, University of Cape Town.

660 van de Ven, T.M.F.N., Fuller, A. & Clutton-Brock, T. (2020). Effects of climate change on pup  
661 growth and survival in a cooperative mammal, the meerkat. *Funct. Ecol.*, 34, 194–202.

662 van de Ven, T.M.F.N., McKechnie, A.E. & Cunningham, S.J. (2019). The costs of keeping cool:  
663 behavioural trade-offs between foraging and thermoregulation are associated with  
664 significant mass losses in an arid-zone bird. *Oecologia*, 191, 205–215.

665 Walther, G.-R., Post, E., Convey, P., Menzel, A., Parmesan, C., Beebee, T.J.C., *et al.* (2002).  
666 Ecological responses to recent climate change. *Nature*, 416, 389–95.

667 Wiley, E.M. (2017). Examining how multilevel population dynamics and climate influence  
668 breeding behaviour, within-group stability and demography in a cooperatively breeding  
669 bird. PhD thesis, University of Western Australia.

670 Wiley, E.M. & Ridley, A.R. (2016). The effects of temperature on offspring provisioning in a  
671 cooperative breeder. *Anim. Behav.*, 117, 187–195.

672 Wiley, E.M. & Ridley, A.R. (2018). The benefits of pair bond tenure in the cooperatively  
673 breeding pied babbler (*Turdoides bicolor*). *Ecol. Evol.*, 8, 7178–7185.

van Wilgen, N.J., Goodall, V., Holness, S., Chown, S.L. & McGeoch, M.A. (2016). Rising temperatures and changing rainfall patterns in South Africa's national parks. *Int. J. Climatol.*, 36, 706–721.

## Table 1

Table 1: Top GLMM model sets for all analyses. Model averaging was implemented on all models with  $\Delta AICc < 5$ . Significant terms after model averaging are shown in bold. Null models shown for comparison with top model sets. For full model sets, see Supporting Information.

| Table 1A: Factors influencing body mass change in fledglings<br>( $n = 124$ individuals from 74 nests by 25 different groups over 14 breeding seasons) |               |               |                    |
|--------------------------------------------------------------------------------------------------------------------------------------------------------|---------------|---------------|--------------------|
|                                                                                                                                                        | $AICc$        | $\Delta AICc$ | $\omega^2$         |
| Null model                                                                                                                                             | 788.50        | 16.32         | 0.00               |
| <i>Top model set:</i>                                                                                                                                  |               |               |                    |
| Rain <sub>60</sub> + Rain <sub>90</sub> + Brood size                                                                                                   | 772.18        | 0.00          | 0.39               |
| Rain <sub>90</sub> + Brood size                                                                                                                        | 773.35        | 1.17          | 0.22               |
| Rain <sub>60</sub> + Rain <sub>90</sub> + Brood size + G.Size <sub>BrSeas</sub>                                                                        | 773.38        | 1.20          | 0.21               |
| Brood size + Sex                                                                                                                                       | 774.35        | 2.17          | 0.13               |
| Rain <sub>60</sub> + Brood size                                                                                                                        | 776.27        | 4.09          | 0.05               |
| <i>Effect size of explanatory terms after model averaging</i>                                                                                          | <i>Effect</i> | <i>SE</i>     | <i>95% CI</i>      |
| Intercept                                                                                                                                              | 29.423        | 0.808         | 27.825/31.021      |
| <b>Brood size</b>                                                                                                                                      | <b>1.778</b>  | <b>0.639</b>  | <b>0.513/3.044</b> |
| G.Size <sub>BrSeas</sub>                                                                                                                               | -0.002        | 0.318         | -0.632/0.629       |
| Rain <sub>60</sub>                                                                                                                                     | 0.636         | 0.674         | -0.692/1.964       |
| <b>Rain<sub>90</sub></b>                                                                                                                               | <b>1.166</b>  | <b>0.776</b>  | <b>0.223/2.695</b> |
| <b>Sex</b>                                                                                                                                             | 0.229         | 0.671         | -1.088/1.548       |

| Table 1B: Factors influencing body mass change in adults<br>( $n = 82$ measures from 53 different individuals at 21 different groups over 11 breeding seasons) |               |               |                      |
|----------------------------------------------------------------------------------------------------------------------------------------------------------------|---------------|---------------|----------------------|
|                                                                                                                                                                | $AICc$        | $\Delta AICc$ | $\omega^2$           |
| Null model                                                                                                                                                     | 453.30        | 16.09         | 0.00                 |
| <i>Top model set:</i>                                                                                                                                          |               |               |                      |
| Mean T <sub>MaxBrSeas</sub> + Rain <sub>BrSeas</sub>                                                                                                           | 437.21        | 0.00          | 0.46                 |
| Mean T <sub>MaxBrSeas</sub> + Rain <sub>BrSeas</sub> + Mean T <sub>MaxBrSeas</sub> * Rain <sub>BrSeas</sub>                                                    | 437.47        | 0.26          | 0.40                 |
| Mean T <sub>MaxBrSeas</sub> + Rain <sub>BrSeas</sub> + G.Size <sub>BrSeas</sub>                                                                                | 439.54        | 2.33          | 0.14                 |
| <i>Effect size of explanatory terms after model averaging</i>                                                                                                  | <i>Effect</i> | <i>SE</i>     | <i>95% CI</i>        |
| Intercept                                                                                                                                                      | 0.210         | 0.439         | -0.663/1.084         |
| <b>Mean T<sub>MaxBrSeas</sub></b>                                                                                                                              | <b>-1.189</b> | <b>0.518</b>  | <b>-2.218/-0.160</b> |

|                                                           |              |              |                    |
|-----------------------------------------------------------|--------------|--------------|--------------------|
| <b>Rain<sub>BrSeas</sub></b>                              | <b>1.695</b> | <b>0.452</b> | <b>0.797/2.594</b> |
| <b>G.Size<sub>BrSeas</sub></b>                            | 0.008        | 0.156        | -0.304/0.320       |
| <b>Mean T<sub>MaxBrSeas</sub> * Rain<sub>BrSeas</sub></b> | -0.282       | 0.543        | -1.357/0.793       |

Table 1C: Effect of conditions experienced between hatching and fledging on interannual survival of juvenile birds  
(*n* = 247 different individuals from 143 broods by 30 different groups over 14 breeding seasons)

|                                                                                                                             | <i>AICc</i>   | $\Delta AICc$ | $\omega^2$           |
|-----------------------------------------------------------------------------------------------------------------------------|---------------|---------------|----------------------|
| Null model                                                                                                                  | 315.50        | 10.17         | 0.00                 |
| <i>Top model set:</i>                                                                                                       |               |               |                      |
| Rain <sub>60</sub> + Mean T <sub>maxBrood</sub> + Rain <sub>60</sub> * Mean T <sub>maxBrood</sub>                           | 305.33        | 0.00          | 0.52                 |
| Rain <sub>60</sub> + Mean T <sub>maxBrood</sub> + G.Size <sub>Brood</sub> + Rain <sub>60</sub> * Mean T <sub>maxBrood</sub> | 307.44        | 2.11          | 0.18                 |
| Rain <sub>60</sub> + Mean T <sub>maxBrood</sub>                                                                             | 307.78        | 2.45          | 0.15                 |
| Rain <sub>60</sub> + Mean T <sub>maxBrood</sub> + G.Size <sub>Brood</sub>                                                   | 309.84        | 4.52          | 0.05                 |
| Rain <sub>60</sub>                                                                                                          | 310.10        | 4.77          | 0.05                 |
| Rain <sub>60</sub> + Sex                                                                                                    | 310.31        | 4.98          | 0.04                 |
| <i>Effect size of explanatory terms after model averaging</i>                                                               |               |               |                      |
|                                                                                                                             | <i>Effect</i> | <i>SE</i>     | <i>95% CI</i>        |
| Intercept                                                                                                                   | 0.901         | 0.209         | 0.489/1.314          |
| G.Size <sub>Brood</sub>                                                                                                     | 0.004         | 0.082         | -0.157/0.165         |
| <b>Mean T<sub>maxBrood</sub></b>                                                                                            | <b>-0.334</b> | <b>0.191</b>  | <b>-0.710/-0.043</b> |
| <b>Rain<sub>60</sub></b>                                                                                                    | <b>0.495</b>  | <b>0.192</b>  | <b>0.117/0.872</b>   |
| <b>Sex</b>                                                                                                                  | -0.017        | 0.101         | -0.216/0.182         |
| Rain <sub>60</sub> + Mean T <sub>maxBrood</sub> + Rain <sub>60</sub> * Mean T <sub>maxBrood</sub>                           | -0.293        | 0.259         | -0.803/0.218         |

\*Residual deviance: 277.56 on 241 degrees of freedom (ratio: 1.147)

Table 1D: Effect of conditions experienced between fledging and independence on interannual survival of juvenile birds  
(*n* = 233 different individuals from 135 broods by 30 different groups over 14 breeding seasons)

|                                                                                                                                  | <i>AICc</i>   | $\Delta AICc$ | $\omega^2$           |
|----------------------------------------------------------------------------------------------------------------------------------|---------------|---------------|----------------------|
| Null model                                                                                                                       | 303.30        | 17.79         | 0.00                 |
| <i>Top model set:</i>                                                                                                            |               |               |                      |
| Drought <sub>BrSeas</sub> + Mean T <sub>max90</sub> + Drought <sub>BrSeas</sub> * Mean T <sub>max90</sub>                        | 286.28        | 0.00          | 0.54                 |
| Drought <sub>BrSeas</sub> + Mean T <sub>max90</sub> + G.Size <sub>90</sub> + Drought <sub>BrSeas</sub> * Mean T <sub>max90</sub> | 286.57        | 0.29          | 0.46                 |
| <i>Effect size of explanatory terms after model averaging</i>                                                                    |               |               |                      |
|                                                                                                                                  | <i>Effect</i> | <i>SE</i>     | <i>95% CI</i>        |
| Intercept                                                                                                                        | 0.709         | 0.167         | 0.379/1.038          |
| <b>Drought<sub>BrSeas</sub> (drought = YES)</b>                                                                                  | <b>1.862</b>  | <b>0.676</b>  | <b>0.531/3.194</b>   |
| G.Size <sub>90</sub>                                                                                                             | 0.099         | 0.152         | -0.199/0.397         |
| <b>Mean T<sub>max90</sub></b>                                                                                                    | <b>-0.363</b> | <b>0.175</b>  | <b>-0.708/-0.018</b> |
| <b>Drought<sub>BrSeas</sub> + Mean T<sub>max90</sub> + Drought<sub>BrSeas</sub> (drought = YES) * Mean T<sub>max90</sub></b>     | <b>-2.845</b> | <b>0.868</b>  | <b>-4.555/-1.136</b> |

\*Residual deviance: 272.911 on 227 degrees of freedom (ratio: 1.202)

Table 1E: Effect of conditions experienced during the breeding season on interannual survival of breeding adults  
(*n* = 352 measurements of interannual survival from 136 different individuals in 37 different groups over 14 breeding seasons)

|                                                                                                                                                    | <i>AICc</i>   | $\Delta AICc$ | $\omega^2$    |
|----------------------------------------------------------------------------------------------------------------------------------------------------|---------------|---------------|---------------|
| Null model                                                                                                                                         | 391.00        | 33.78         | 0.00          |
| <i>Top model set:</i>                                                                                                                              |               |               |               |
| Drought <sub>BrSeas</sub> + Mean T <sub>maxBrSeas</sub> + Drought <sub>BrSeas</sub> * Mean T <sub>maxBrSeas</sub>                                  | 357.22        | 0.00          | 0.58          |
| Drought <sub>BrSeas</sub> + Mean T <sub>maxBrSeas</sub> + <b>G.Size<sub>BrSeas</sub></b> + Drought <sub>BrSeas</sub> * Mean T <sub>maxBrSeas</sub> | 357.84        | 0.62          | 0.42          |
| <i>Effect size of explanatory terms after model averaging</i>                                                                                      |               |               |               |
|                                                                                                                                                    | <i>Effect</i> | <i>SE</i>     | <i>95% CI</i> |

|                                                                                                                                      |               |              |                      |
|--------------------------------------------------------------------------------------------------------------------------------------|---------------|--------------|----------------------|
| Intercept                                                                                                                            | 1.763         | 0.199        | 1.371/2.154          |
| <b>Drought<sub>BrSeas</sub> (drought = YES)</b>                                                                                      | <b>-1.240</b> | <b>0.230</b> | <b>-1.693/-0.787</b> |
| G.Size <sub>BrSeas</sub>                                                                                                             | 0.092         | 0.159        | -0.219/0.404         |
| Mean T <sub>maxBrSeas</sub>                                                                                                          | 0.404         | 0.161        | -0.086/0.721         |
| <b>Drought<sub>BrSeas</sub> + Mean T<sub>maxBrSeas</sub> + Drought<sub>BrSeas</sub> (drought = YES) * Mean T<sub>maxBrSeas</sub></b> | <b>-1.184</b> | <b>0.216</b> | <b>-1.609/-0.758</b> |
| * Residual deviance: 288.145 on 346 degrees of freedom (ratio: 0.833)                                                                |               |              |                      |

682

683

## Figures

Fig. 1: (A) Average maximum temperature (black dashes  $\pm 1$  SD) and total rainfall (vertical bars: no colour = no drought, hatched = drought) for each austral summer breeding season studied from 2005 to 2019. Dashed horizontal line represents rainfall = 137.75 mm; years with rainfall < 137.75 mm were classified as drought years. (B) Boxplots show median (black line), first and third quartiles (box), and interquartile range (whiskers) for the distribution of average group size across each breeding season. Open circles represent data points (jittered for improved visibility) and lines present the study-wide average group size (solid horizontal line)  $\pm 1$  SD (dashed horizontal lines).

Fig. 2: Change in body mass in southern pied babbler *Turdoides bicolor* fledglings between the fledging and nutritional independence in relation to (A) brood size and (B) rainfall (mm) between the fledging and nutritional independence and in adults between the start and end of the breeding season in relation to (C) average daily maximum temperatures and (D) total rainfall (mm) during the breeding season. Data points in (A) are jittered for improved visibility. Juvenile pied babblers from larger broods gained more mass between 11- and 90-days-of-age. This is likely explained by nestlings from larger broods fledgling at a smaller body mass, and hence growing more once they had left the nest, than those which fledged from smaller broods and may have attained larger mass while still in the nest.

Fig. 3: Interannual survival (0 = not present, 1 = present) in juvenile southern pied babblers *Turdoides bicolor* in relation to (A) rainfall prior to hatching; (B) mean daily maximum temperature between hatching and fledging; and (C) the interaction between temperature and drought between fledge and independence (non-drought breeding seasons: open circles, dashed confidence intervals, black colour; drought breeding seasons: open triangles, dotted confidence intervals, gray colour). Data points are integers (0,1) jittered for improved visibility. Individuals in the study population are uniquely identifiable by their colour and metal ring combinations (D; photograph by Nicholas B. Pattinson).

Fig. 4: Survival of breeding adult southern pied babblers *Turdoides bicolor* from one breeding season to the next in relation to temperature and drought conditions during the initial breeding season (non-drought years: open circles, dashed confidence intervals, black colour; drought years: open triangles, dotted confidence intervals, gray colour). Data points are integers (0,1) jittered for improved visibility.

**Figure 1**

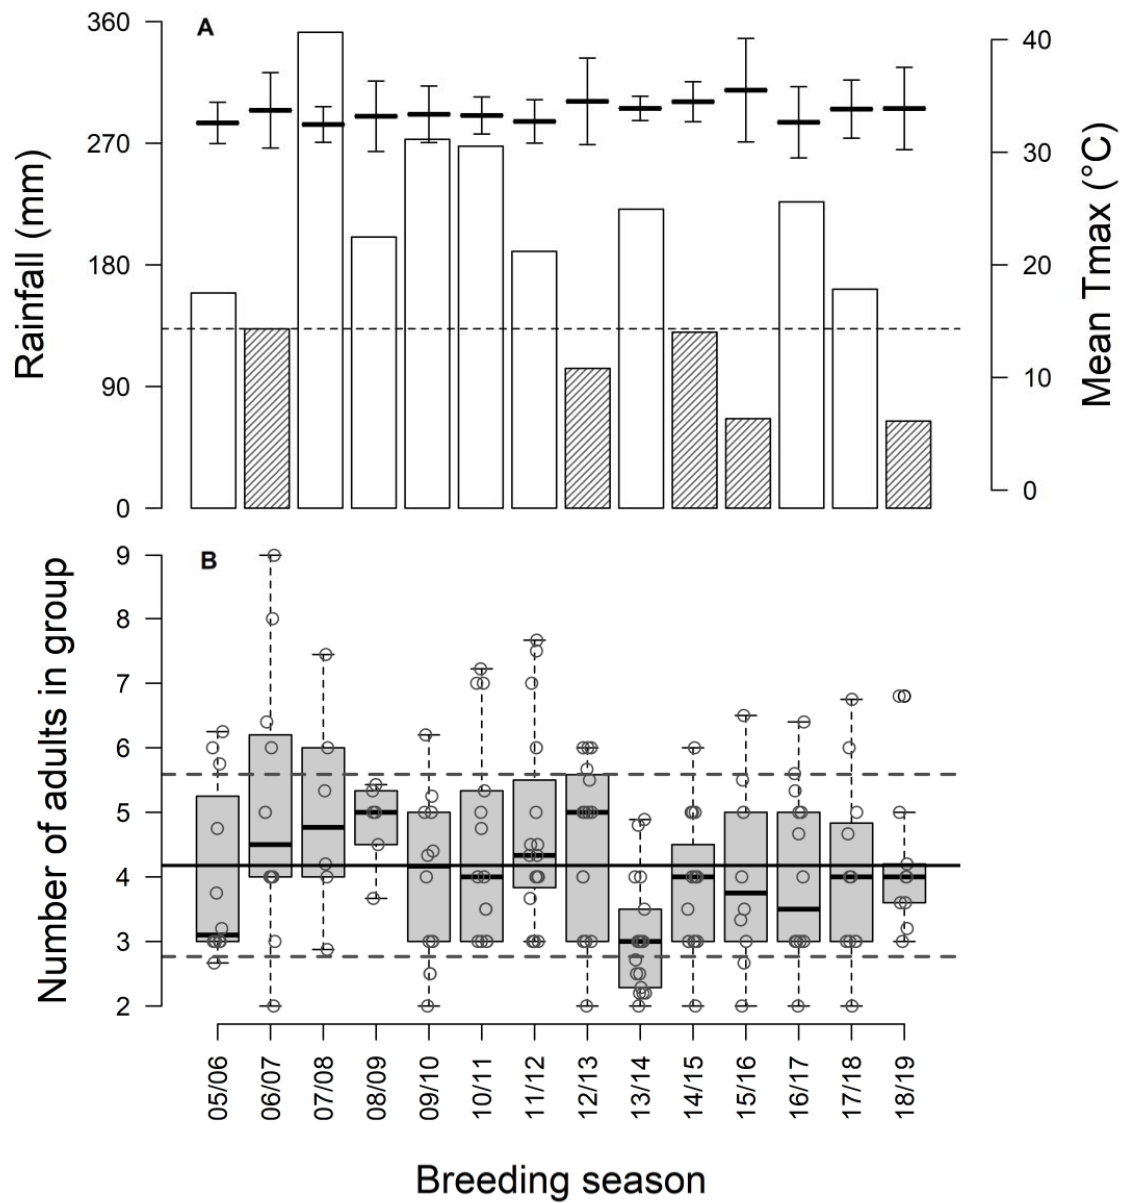

**Figure 2**

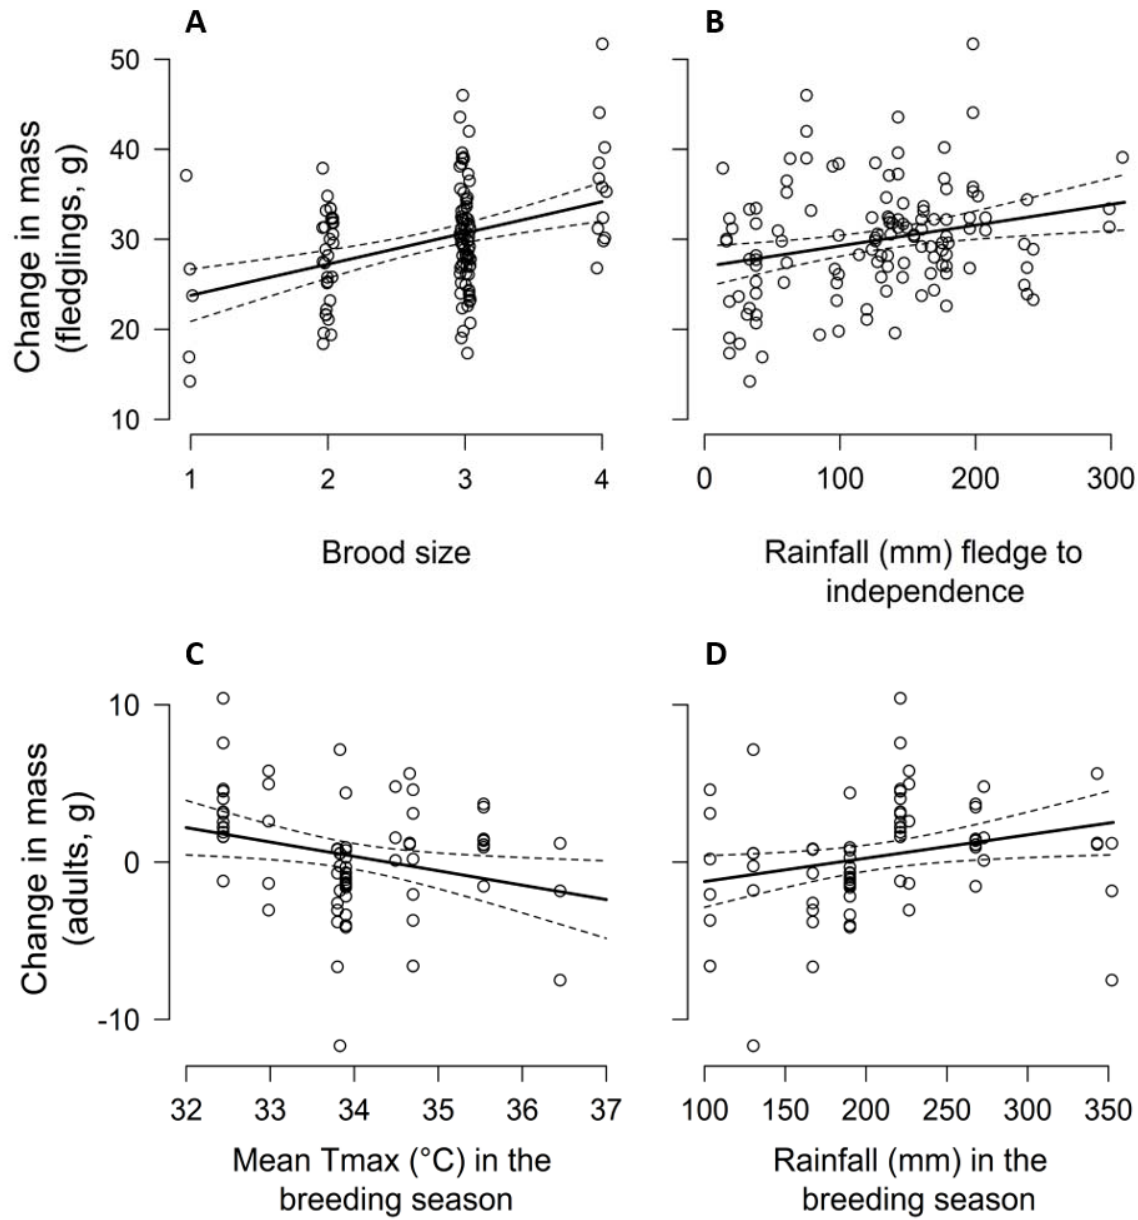



**Figure 3**

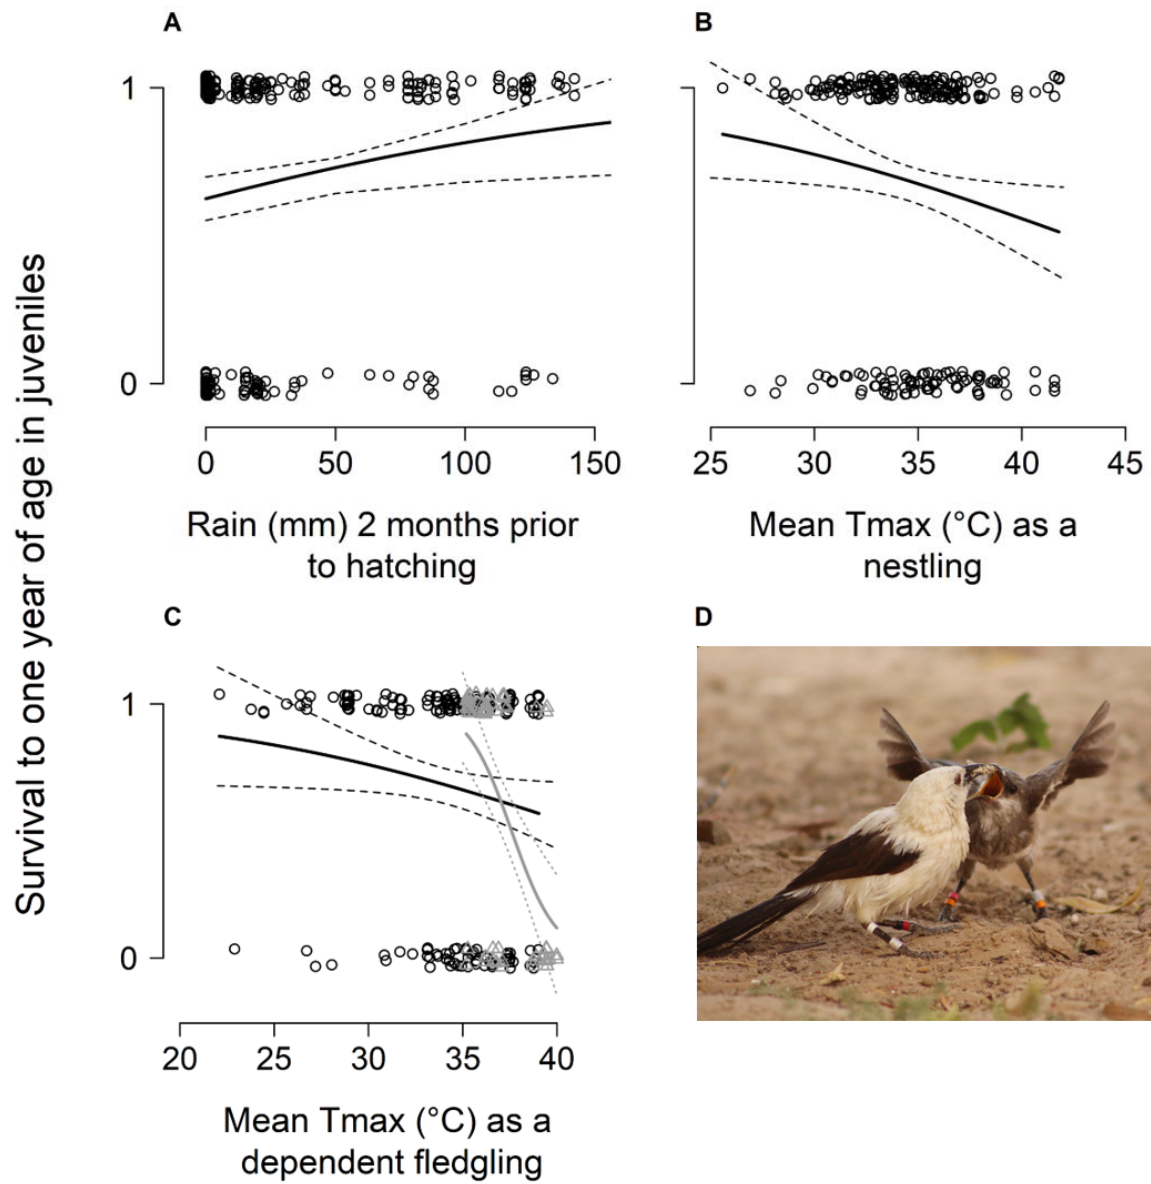

720 **Figure 4**

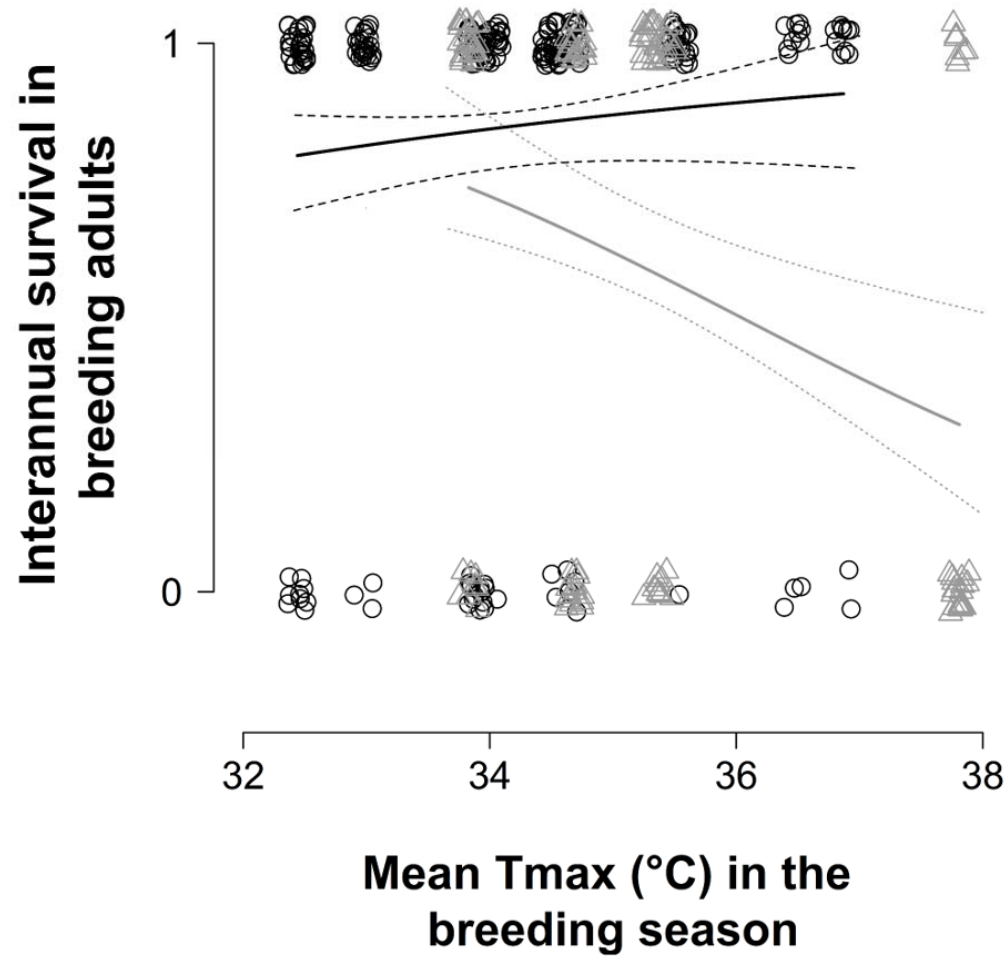

Source: https://biorxiv.org/content/10.1101/2020.06.11.147538v1.full.pdf
